# Supplementary material for: Fabrication of NiCo2O4 and carbon nanotube nanocomposite films as a high-performance flexible electrode of supercapacitors
Source: Royal Society of Chemistry journal article supplement (doi:10.1039/c5ra12855b), 2015-01-01
Supplement: c5ra12855b1.pdf [file c5ra12855b1.pdf]

**Supporting Information**

**Fabrication of NiCo<sub>2</sub>O<sub>4</sub> and Carbon Nanotube Nanocomposite Films as High-performance Flexible Electrode of Supercapacitor**

Shanshan Xu,<sup>a</sup> Deming Yang,<sup>a</sup> Fan Zhang,<sup>bc</sup> Jiacheng Liu,<sup>a</sup> Anran Guo<sup>a</sup> and Feng Hou<sup>\*a</sup>

<sup>a</sup>Key Laboratory of Advanced Ceramics and Machining Technology, Ministry of Education,

School of Materials Science and Engineering, Tianjin University, Tianjin 300072, China

<sup>b</sup>Wanger Institute for Sustainable Energy Research

<sup>c</sup>Department of Mechanical, Materials and Aerospace Engineering, Illinois Institute of

Technology, Illinois, USA

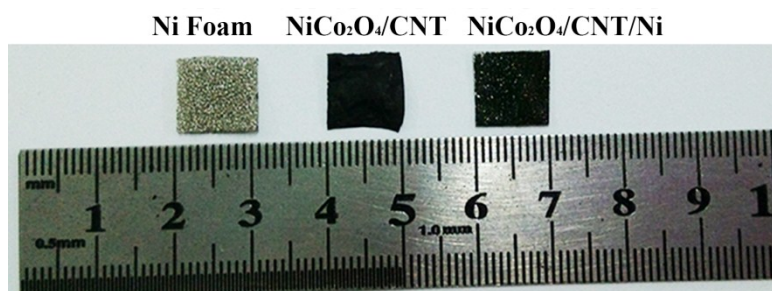

**Fig. S1** Fabrication of the working electrode.

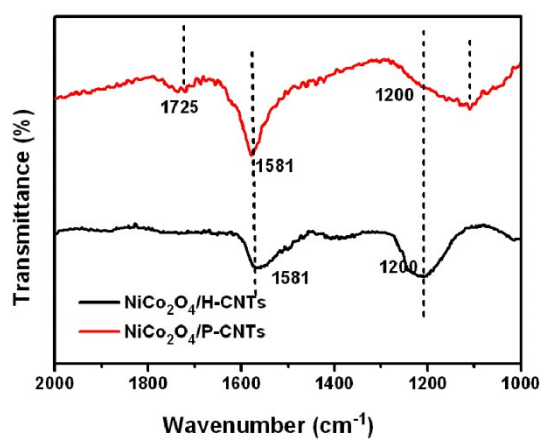

**Fig. S2** FT-IR spectra of pristine CNTs and H-CNTs: The sample of pristine CNTs has two peaks:  $1581\text{ cm}^{-1}$  and  $1200\text{ cm}^{-1}$ , assigned to the carbon skeleton.<sup>1,2</sup> Comparing with pristine CNTs, the extra peaks in H-CNTs at  $1725\text{ cm}^{-1}$  and  $1100\text{ cm}^{-1}$  are corresponding to C=O and C-O stretching vibration of carboxyl group which manifests the formation of hydrophilic groups on the surface of CNTs.

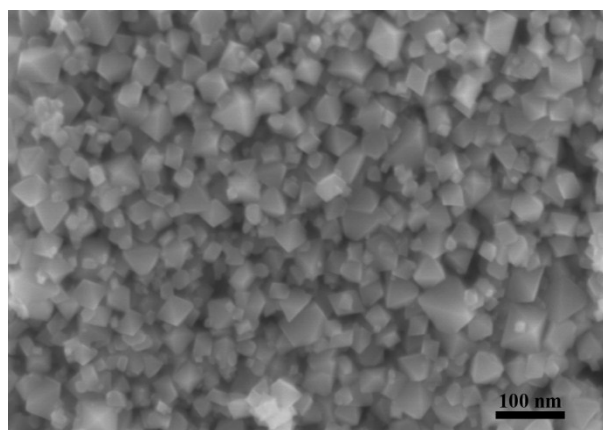

**Fig. S3** The morphology of pure  $\text{NiCo}_2\text{O}_4$ .

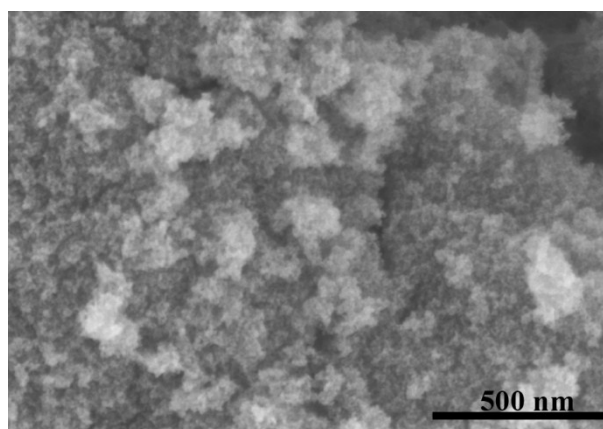

**Fig. S4** SEM images of excessive  $\text{NiCo}_2\text{O}_4$  deposition on CNT films.

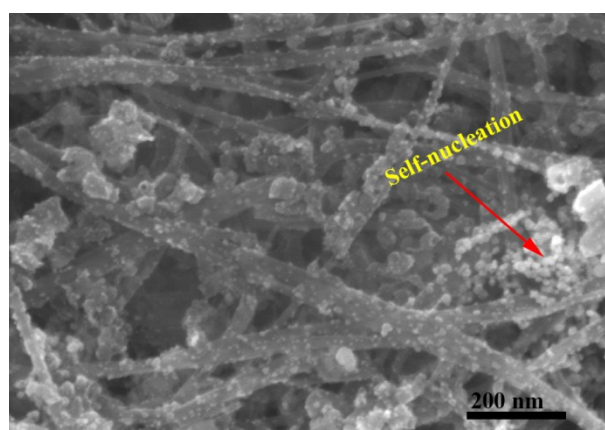

**Fig. S5** SEM images of  $\text{NiCo}_2\text{O}_4$  deposition on CNT films without drying process before adding ammonia.

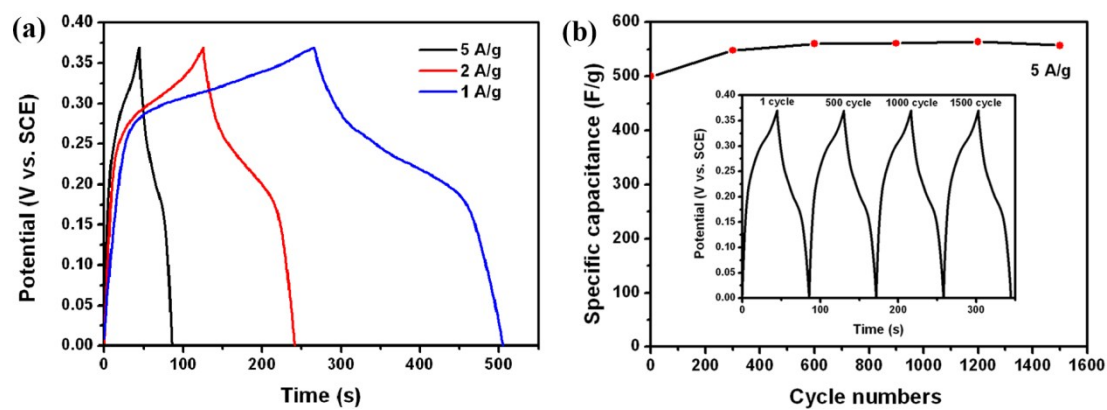

**Fig. S6** Galvanostatic charge-discharge at different current densities curves of NiCo<sub>2</sub>O<sub>4</sub>/CNTs-50%

(a); cycling stability of NiCo<sub>2</sub>O<sub>4</sub>/ CNTs-50% electrodes at a current density of 5 A/g (b).

#### Reference:

1. M. S. P. Shaffer, X. Fan and A. H. Windle, *Carbon*, 1998, **36**, 1603-1612.
2. T. G. Ros, A. J. van Dillen, J. W. Geus and D. C. Koningsberger, *Chem.-Eur. J.*, 2002, **8**, 1151-1162.
